# Supplementary material
Source: MDPI journal article supplement (https://www.mdpi.com/2073-4441/16/5/677)
Supplement: s1 [file s1]

## Contents

1. Scripts for image pre-processing using dense stacks of Landsat imagery including date filtering, cloud masking and image mosaicking, RF classification, accuracy assessment, regional area calculation.
2. Scripts for comparative analysis of different classifiers.
3. Download link of composite image after NDVI and MNDWI Masks.
4. Download link of training sample dataset.
5. Download link of land cover dataset

- 1. Scripts for image pre-processing using dense stacks of Landsat imagery, including date filtering, cloud masking and image mosaicking, random forest (RF) classification, accuracy assessment, and regional area calculations.**

Take the extraction of rainy and dry season surface water in 2008 as an example.

Links to the Google Earth Engine: l5\_2008\_rainy\_season\_classification.

YR\_rainy\_season\_mean\_water\_2008\_cloud90\_0325\_addDEM\_2\_show

<https://code.earthengine.google.com/938a2140afa989efc9373f69f9eb56a4>

Links to the Google Earth Engine: l5\_2008\_dry\_season\_classification.

YR\_dry\_Season\_mean\_water\_2008\_cloud90\_2502\_addDEM\_1\_show

<https://code.earthengine.google.com/438c5d8522c20109fcd6b9444f9c90a3>

- 2. Scripts for the comparative analysis of different classifiers.**

Links to the Google Earth Engine: compare with different classifiers.

YR\_rainy\_season\_mean\_water\_1999\_cloud90\_0325\_addDEM\_1\_Comparation\_test\_show

<https://code.earthengine.google.com/6bf5ca3545b154bc507c1e48f3e287bc>

### 3. Download link of Landsat composite image after NDVI and MNDWI Masks.

Links to the Google Drive of Landsat composite image.

2003\_2005\_rainy\_Yangtze\_mean\_River\_MNDWI\_cloud90\_0325\_addDEM\_1

<https://drive.google.com/drive/folders/1annuEsvY5qmBd0-6MI8FcfLtMHZPe3F?usp=sharing>

### 4. Download link of training sample dataset.

Links to the Google Drive of training sample points.

2003-2005\_rainy\_Yangtze\_mean\_River\_cloud90\_0325\_TS\_1

<https://drive.google.com/drive/folders/1ILDpCrMrFvPIXxs5SpXsZUzfFyIX4QjE?usp=sharing>

### 5. Download link of surface water dataset

Links to the Google Drive of surface water dataset

2003\_rainy\_Yangtze\_mean\_River\_MNDWI\_cloud90\_0325\_Water\_addDEM\_1

<https://drive.google.com/drive/folders/1zR2CTI9yGRCHNMSzqGhXhJpHeU14x8ci?usp=sharing>

2003\_rainy\_Yangtze\_mean\_River\_MNDWI\_cloud90\_0325\_Ice\_addDEM\_1

<https://drive.google.com/drive/folders/1yHb8EBRe4aDTs1JvPNEvCqmbFXfSDxzn?usp=sharing>

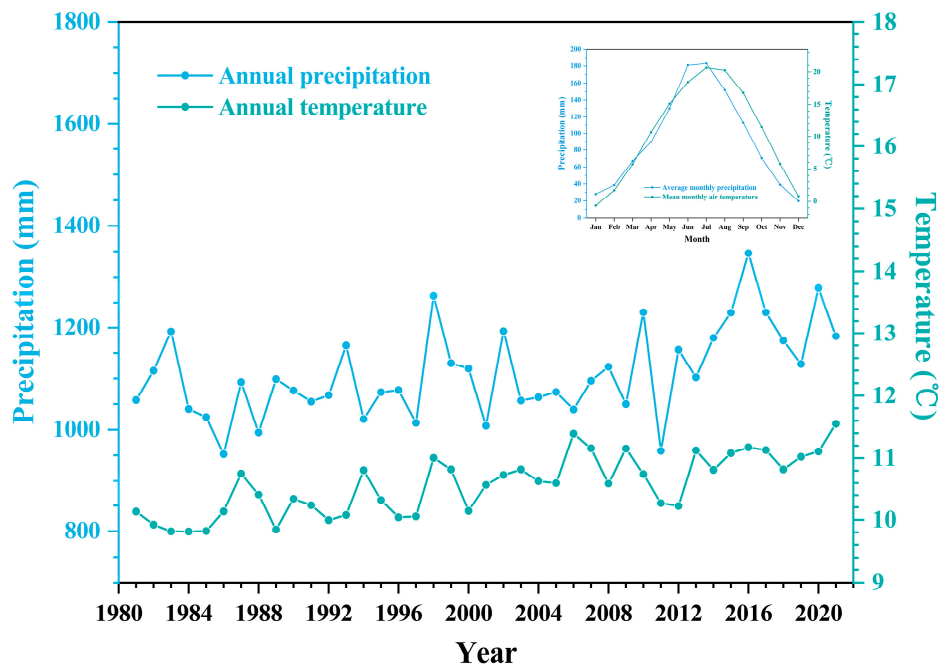

**Figure S1.** Annual precipitation and temperature in the YRB from 1981 to 2021. The illustration shows the average monthly precipitation and mean monthly air temperature in the YRB from 1981 to 2021.

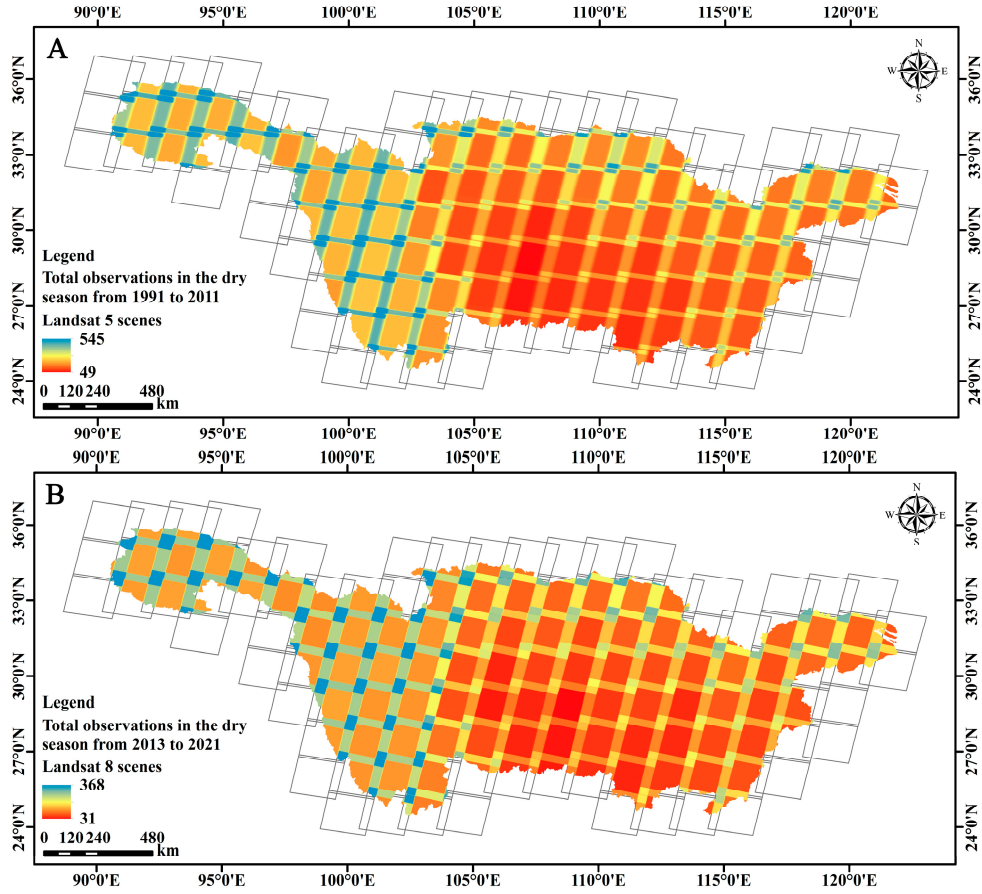

**Figure S2.** Spatial distribution of total observations in the dry season for the entire YRB during the study period: (a) Landsat 5 scenes from 1991 to 2011; (b) Landsat 8 scenes from 2013 to 2021.

**Table S1.** Accuracy assessment of the classification results for the rainy and dry season composite images in the Yangtze River Basin from 1991 to 2021.

| Year | Composite Images in the Rainy Season |       | Composite Images in the Dry Season |       |
|------|--------------------------------------|-------|------------------------------------|-------|
|      | Overall Accuracy                     | Kappa | Overall Accuracy                   | Kappa |
| 1990 | 0.96                                 | 0.93  | 0.97                               | 0.94  |
| 1991 | 0.97                                 | 0.94  | 0.96                               | 0.93  |
| 1992 | 0.98                                 | 0.97  | 0.97                               | 0.95  |
| 1993 | 0.96                                 | 0.92  | 0.97                               | 0.95  |
| 1994 | 0.98                                 | 0.96  | 0.96                               | 0.94  |
| 1995 | 0.98                                 | 0.97  | 0.96                               | 0.93  |
| 1996 | 0.97                                 | 0.94  | 0.97                               | 0.95  |
| 1997 | 0.98                                 | 0.96  | 0.96                               | 0.93  |
| 1998 | 0.98                                 | 0.97  | 0.97                               | 0.95  |
| 1999 | 0.97                                 | 0.94  | 0.97                               | 0.95  |
| 2000 | 0.98                                 | 0.97  | 0.97                               | 0.94  |
| 2001 | 0.99                                 | 0.98  | 0.99                               | 0.97  |
| 2002 | 0.97                                 | 0.95  | 0.96                               | 0.92  |
| 2003 | 0.99                                 | 0.98  | 0.99                               | 0.98  |
| 2004 | 0.99                                 | 0.98  | 0.97                               | 0.95  |

|      |      |      |      |      |
|------|------|------|------|------|
| 2005 | 0.98 | 0.97 | 0.96 | 0.93 |
| 2006 | 0.99 | 0.99 | 0.98 | 0.97 |
| 2007 | 0.99 | 0.99 | 0.93 | 0.89 |
| 2008 | 0.99 | 0.99 | 0.97 | 0.96 |
| 2009 | 0.99 | 0.98 | 0.97 | 0.95 |
| 2010 | 0.98 | 0.96 | 0.97 | 0.94 |
| 2011 | 0.99 | 0.97 | 0.96 | 0.91 |
| 2012 | 0.97 | 0.94 | 0.97 | 0.93 |
| 2013 | 0.98 | 0.97 | 0.97 | 0.95 |
| 2014 | 0.98 | 0.97 | 0.97 | 0.95 |
| 2015 | 0.99 | 0.98 | 0.97 | 0.94 |
| 2016 | 0.99 | 0.98 | 0.99 | 0.98 |
| 2017 | 0.98 | 0.97 | 0.99 | 0.98 |
| 2018 | 0.97 | 0.95 | 0.96 | 0.93 |
| 2019 | 0.98 | 0.96 | 0.97 | 0.94 |
| 2020 | 0.98 | 0.96 | 0.98 | 0.96 |
| 2021 | 0.98 | 0.96 |      |      |

**Table S2.** Comparative analysis and evaluation of different classification algorithms for the rainy season composite image in 1999.

| Classifier       | Land cover types | UA     | PA     | overall accuracy | kappa accuracy |
|------------------|------------------|--------|--------|------------------|----------------|
| CART             | water            | 0.9580 | 0.9730 | 0.9455           | 0.9083         |
|                  | Ice/snow         | 0.8631 | 0.9063 |                  |                |
|                  | non-water        | 0.9585 | 0.9361 |                  |                |
| Random Forest    | water            | 0.9843 | 0.9888 | 0.9735           | 0.9551         |
|                  | Ice/snow         | 0.9484 | 0.9188 |                  |                |
|                  | non-water        | 0.9721 | 0.9766 |                  |                |
| Minimum Distance | water            | 0.5972 | 0.9461 | 0.5172           | 0.3262         |
|                  | Ice/snow         | 0.3493 | 1.0000 |                  |                |
|                  | non-water        | 0.7619 | 0.0997 |                  |                |
| LIBSVM           | water            | 0.9478 | 0.9798 | 0.9479           | 0.9117         |
|                  | Ice/snow         | 0.9211 | 0.8750 |                  |                |
|                  | non-water        | 0.9543 | 0.9439 |                  |                |

**Figure S3.** Dynamics of seasonal and permanent surface water resources in the secondary water systems

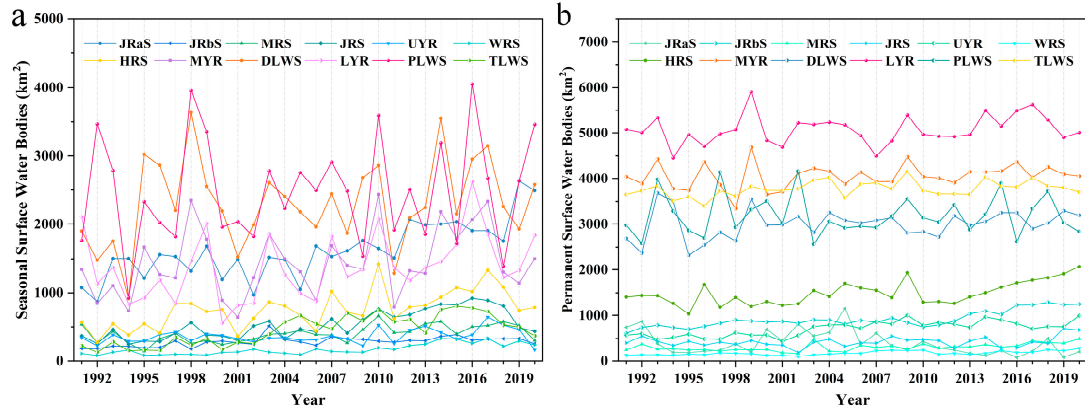

of the YRB from 1991 to 2020. (a) Dynamics of seasonal surface water bodies in the 12 water systems in the YRB. (b) Dynamic changes of permanent surface water bodies in the 12 water systems in the YRB.

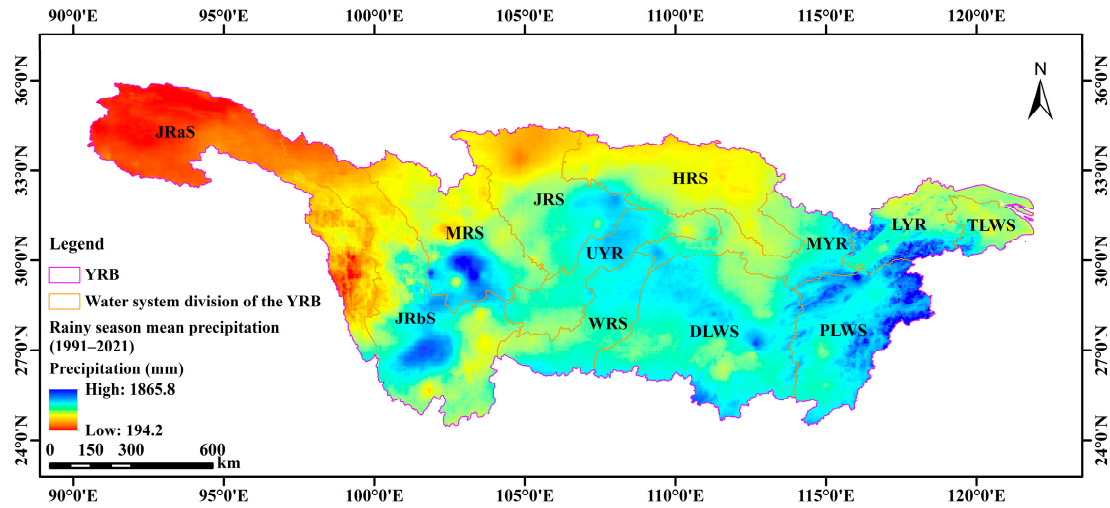

**Figure S4.** Spatial distribution of the rainy season mean precipitation in the YRB from 1991 to 2021.

**Table S3.** Rainy season precipitation in the YRB and its 12 secondary river systems from 1991 to 2021.

| Year | YRB   | JRaS  | JRbS   | MRS   | JRS   | UYR    | WRS    | HRS   | DLWS   | MYR    | PLWS   | LYR    | TLWS   |
|------|-------|-------|--------|-------|-------|--------|--------|-------|--------|--------|--------|--------|--------|
| 1991 | 764.3 | 395.3 | 877.8  | 758.9 | 640.8 | 901.0  | 912.4  | 647.1 | 797.3  | 935.8  | 746.6  | 1204.6 | 1034.5 |
| 1992 | 735.5 | 326.3 | 649.6  | 850.4 | 844.1 | 899.0  | 894.7  | 684.9 | 807.1  | 780.4  | 982.8  | 722.1  | 729.5  |
| 1993 | 870.2 | 436.9 | 856.1  | 890.5 | 822.9 | 883.4  | 934.8  | 630.4 | 1116.1 | 903.2  | 1273.0 | 984.8  | 945.0  |
| 1994 | 746.4 | 302.6 | 726.8  | 771.6 | 620.2 | 832.6  | 802.5  | 594.9 | 1072.1 | 759.3  | 1134.5 | 693.8  | 634.6  |
| 1995 | 813.8 | 378.6 | 843.3  | 842.5 | 672.1 | 917.4  | 976.5  | 668.3 | 967.1  | 990.7  | 1139.9 | 875.1  | 774.0  |
| 1996 | 816.1 | 397.6 | 737.8  | 778.0 | 649.6 | 996.3  | 1065.8 | 704.8 | 1029.0 | 1007.5 | 1038.3 | 1051.6 | 832.2  |
| 1997 | 716.2 | 355.5 | 776.5  | 728.0 | 539.8 | 779.0  | 860.6  | 489.4 | 871.2  | 804.2  | 1124.0 | 725.9  | 726.1  |
| 1998 | 927.4 | 455.6 | 992.6  | 946.1 | 895.0 | 1091.7 | 1060.0 | 759.8 | 1072.3 | 976.9  | 1297.8 | 924.7  | 808.0  |
| 1999 | 902.2 | 409.8 | 1001.4 | 889.9 | 809.0 | 980.3  | 1042.3 | 656.0 | 1076.9 | 871.1  | 1376.1 | 1004.7 | 958.3  |
| 2000 | 869.2 | 445.8 | 843.8  | 780.2 | 826.1 | 1056.6 | 1061.8 | 918.3 | 1020.0 | 1046.0 | 1055.2 | 888.8  | 779.7  |
| 2001 | 731.8 | 439.6 | 916.5  | 846.6 | 681.9 | 770.2  | 795.5  | 553.0 | 780.0  | 616.3  | 938.7  | 672.7  | 786.6  |

|      |       |       |       |        |        |        |        |        |        |        |        |        |        |
|------|-------|-------|-------|--------|--------|--------|--------|--------|--------|--------|--------|--------|--------|
| 2002 | 870.1 | 450.1 | 807.4 | 700.9  | 684.0  | 963.0  | 1009.9 | 683.3  | 1257.6 | 1007.8 | 1308.2 | 902.7  | 777.2  |
| 2003 | 787.8 | 441.9 | 806.7 | 871.9  | 892.3  | 955.0  | 816.5  | 836.8  | 782.3  | 877.2  | 802.5  | 942.6  | 673.7  |
| 2004 | 796.3 | 439.5 | 836.6 | 835.6  | 701.2  | 911.6  | 968.8  | 712.7  | 959.4  | 951.0  | 919.4  | 794.8  | 606.0  |
| 2005 | 804.8 | 454.0 | 799.3 | 844.4  | 803.4  | 972.1  | 805.7  | 900.5  | 803.4  | 910.3  | 1009.5 | 885.4  | 699.8  |
| 2006 | 756.9 | 387.1 | 756.0 | 749.0  | 674.9  | 767.4  | 763.9  | 641.5  | 976.1  | 769.0  | 1118.0 | 833.4  | 709.7  |
| 2007 | 836.2 | 414.4 | 835.9 | 842.1  | 844.1  | 1172.8 | 1099.0 | 803.3  | 903.8  | 993.4  | 891.6  | 888.2  | 820.5  |
| 2008 | 853.2 | 439.7 | 841.7 | 791.4  | 835.3  | 992.0  | 1024.6 | 784.6  | 983.1  | 1088.5 | 1047.3 | 952.3  | 847.9  |
| 2009 | 762.2 | 481.3 | 791.3 | 824.7  | 816.6  | 913.5  | 803.3  | 664.1  | 761.2  | 812.6  | 858.0  | 916.1  | 873.1  |
| 2010 | 927.2 | 472.0 | 808.0 | 917.1  | 883.0  | 961.4  | 932.9  | 869.5  | 1133.2 | 1121.5 | 1393.3 | 1059.5 | 803.9  |
| 2011 | 768.1 | 415.1 | 630.6 | 797.6  | 939.5  | 783.2  | 719.3  | 821.0  | 800.9  | 861.5  | 960.4  | 1058.0 | 976.2  |
| 2012 | 850.7 | 454.9 | 831.7 | 877.5  | 851.4  | 1043.8 | 1003.5 | 702.5  | 982.3  | 884.8  | 1146.7 | 884.3  | 801.1  |
| 2013 | 814.8 | 415.1 | 799.9 | 918.7  | 944.5  | 1001.7 | 874.5  | 760.7  | 869.7  | 978.3  | 856.4  | 928.2  | 782.9  |
| 2014 | 897.8 | 473.4 | 867.3 | 901.2  | 812.1  | 1089.7 | 1124.2 | 723.9  | 1072.2 | 884.4  | 1271.9 | 968.9  | 942.5  |
| 2015 | 896.9 | 366.0 | 850.4 | 854.7  | 742.9  | 945.4  | 1106.1 | 686.0  | 1125.3 | 952.1  | 1410.9 | 1217.7 | 1079.4 |
| 2016 | 965.1 | 431.8 | 890.1 | 859.5  | 737.6  | 1067.8 | 1075.8 | 773.7  | 1169.9 | 1239.9 | 1502.2 | 1391.5 | 1200.9 |
| 2017 | 942.6 | 436.2 | 856.4 | 864.0  | 829.6  | 1100.1 | 1078.8 | 908.4  | 1147.9 | 1173.8 | 1240.5 | 1205.4 | 1083.5 |
| 2018 | 858.5 | 486.4 | 912.6 | 1044.0 | 818.4  | 925.4  | 944.9  | 631.7  | 1047.8 | 752.6  | 1033.8 | 895.9  | 966.8  |
| 2019 | 839.0 | 423.9 | 828.5 | 996.9  | 920.9  | 974.6  | 970.7  | 718.8  | 1032.0 | 700.2  | 1081.1 | 660.3  | 785.5  |
| 2020 | 982.5 | 412.1 | 865.2 | 1037.4 | 900.6  | 1059.0 | 1188.5 | 788.8  | 1165.7 | 1280.8 | 1356.5 | 1392.8 | 1090.0 |
| 2021 | 948.6 | 408.6 | 830.6 | 939.1  | 1077.3 | 1098.1 | 1067.5 | 1006.3 | 1062.9 | 990.5  | 1213.2 | 1168.8 | 1203.7 |

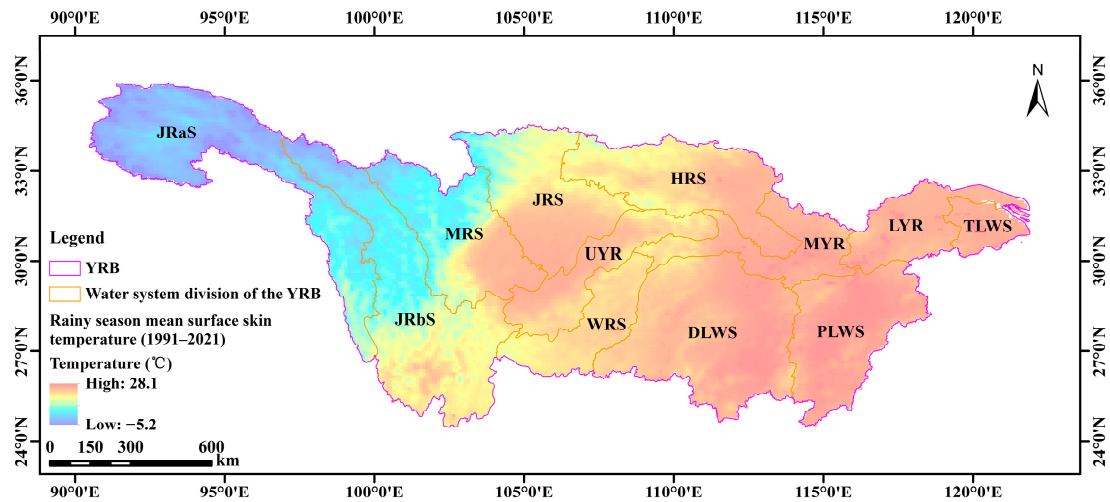

**Figure S5.** Spatial distribution of mean surface skin temperature in the YRB during the rainy season from 1991 to 2021.

**Table S4.** Surface skin temperature in the YRB and its 12 secondary river systems during the rainy season from 1991 to 2021.

| Year | YRB  | JRaS | JRbS | MRS  | JRS  | UYR  | WRS  | HRS  | DLWS | MYR  | PLWS | LYR  | TLWS |
|------|------|------|------|------|------|------|------|------|------|------|------|------|------|
| 1991 | 17.4 | 4.9  | 12.7 | 13.6 | 18.4 | 21.0 | 19.4 | 20.0 | 22.8 | 22.6 | 24.5 | 23.0 | 23.5 |
| 1992 | 17.1 | 3.9  | 12.4 | 13.1 | 17.7 | 21.0 | 19.4 | 19.6 | 22.9 | 22.5 | 23.9 | 22.8 | 23.1 |
| 1993 | 16.9 | 4.0  | 12.7 | 13.3 | 17.7 | 20.6 | 19.1 | 19.4 | 22.3 | 22.2 | 23.5 | 22.5 | 22.9 |
| 1994 | 17.8 | 5.4  | 13.3 | 14.1 | 18.5 | 21.4 | 19.7 | 20.5 | 22.7 | 23.2 | 24.1 | 24.3 | 24.9 |

|      |      |     |      |      |      |      |      |      |      |      |      |      |      |
|------|------|-----|------|------|------|------|------|------|------|------|------|------|------|
| 1995 | 17.9 | 5.0 | 13.1 | 14.2 | 18.7 | 21.7 | 20.0 | 21.0 | 23.4 | 23.5 | 24.3 | 23.8 | 24.0 |
| 1996 | 17.5 | 4.5 | 13.0 | 13.8 | 18.3 | 21.2 | 19.7 | 20.1 | 22.9 | 22.8 | 24.4 | 23.5 | 24.0 |
| 1997 | 17.2 | 3.4 | 12.3 | 13.2 | 18.5 | 21.2 | 19.4 | 20.7 | 22.5 | 23.1 | 23.4 | 23.5 | 23.8 |
| 1998 | 18.2 | 5.4 | 13.6 | 14.4 | 18.9 | 21.7 | 20.2 | 20.8 | 23.7 | 23.4 | 25.0 | 23.8 | 24.3 |
| 1999 | 17.5 | 4.6 | 13.1 | 13.7 | 18.4 | 21.2 | 19.7 | 20.4 | 22.7 | 22.7 | 24.2 | 23.0 | 23.3 |
| 2000 | 17.5 | 4.1 | 12.7 | 13.8 | 18.6 | 21.3 | 19.8 | 20.4 | 22.9 | 23.2 | 24.4 | 23.9 | 24.1 |
| 2001 | 17.7 | 4.2 | 12.8 | 13.6 | 18.5 | 21.5 | 19.9 | 20.6 | 23.4 | 23.8 | 24.4 | 23.8 | 24.0 |
| 2002 | 17.3 | 4.2 | 12.6 | 13.7 | 18.7 | 21.3 | 19.5 | 20.3 | 22.4 | 22.7 | 23.7 | 23.2 | 23.6 |
| 2003 | 17.9 | 5.0 | 13.3 | 13.8 | 18.3 | 21.3 | 19.9 | 20.1 | 23.6 | 23.3 | 25.5 | 23.8 | 24.4 |
| 2004 | 17.3 | 4.3 | 12.5 | 13.1 | 17.9 | 20.7 | 19.4 | 20.0 | 23.0 | 22.9 | 24.3 | 23.6 | 24.1 |
| 2005 | 18.1 | 4.5 | 13.5 | 14.1 | 18.8 | 21.9 | 20.5 | 20.7 | 24.0 | 23.7 | 25.2 | 24.3 | 24.6 |
| 2006 | 18.5 | 4.8 | 13.4 | 14.7 | 19.9 | 23.0 | 20.9 | 21.7 | 24.0 | 24.4 | 24.9 | 24.4 | 24.7 |
| 2007 | 18.1 | 5.1 | 13.0 | 14.2 | 18.8 | 21.7 | 20.0 | 21.0 | 23.9 | 23.9 | 25.4 | 24.3 | 24.8 |
| 2008 | 17.9 | 4.1 | 12.9 | 14.1 | 18.9 | 21.8 | 20.2 | 20.8 | 23.8 | 23.6 | 25.0 | 24.0 | 24.5 |
| 2009 | 18.2 | 4.5 | 13.5 | 14.2 | 18.8 | 21.8 | 20.3 | 20.8 | 24.2 | 24.0 | 25.4 | 24.2 | 24.6 |
| 2010 | 17.8 | 5.2 | 13.5 | 14.0 | 18.6 | 21.4 | 19.6 | 20.5 | 23.2 | 23.1 | 24.7 | 23.6 | 24.1 |
| 2011 | 17.6 | 3.7 | 13.0 | 14.1 | 18.5 | 21.9 | 20.3 | 20.4 | 23.3 | 23.0 | 24.4 | 23.5 | 24.2 |
| 2012 | 17.8 | 4.6 | 13.3 | 13.8 | 18.6 | 21.4 | 19.8 | 21.0 | 23.2 | 23.4 | 24.4 | 23.7 | 24.0 |
| 2013 | 18.2 | 4.6 | 13.0 | 14.2 | 19.2 | 22.2 | 20.4 | 21.7 | 24.0 | 24.0 | 25.2 | 24.3 | 25.0 |
| 2014 | 17.9 | 5.0 | 13.6 | 14.0 | 18.6 | 21.3 | 20.1 | 20.7 | 23.4 | 22.9 | 24.9 | 23.2 | 23.5 |
| 2015 | 17.7 | 5.1 | 13.4 | 14.2 | 18.7 | 21.4 | 19.9 | 20.5 | 23.0 | 23.0 | 23.9 | 22.9 | 23.2 |
| 2016 | 18.3 | 5.1 | 13.7 | 14.7 | 19.3 | 22.1 | 20.4 | 21.4 | 23.6 | 23.6 | 25.0 | 23.9 | 24.5 |
| 2017 | 18.1 | 4.9 | 13.5 | 14.4 | 19.1 | 21.9 | 20.4 | 20.9 | 23.5 | 23.3 | 25.2 | 23.8 | 24.5 |
| 2018 | 18.1 | 4.8 | 13.2 | 13.9 | 19.0 | 21.8 | 20.2 | 21.1 | 23.7 | 24.0 | 25.1 | 24.3 | 24.5 |
| 2019 | 18.2 | 4.8 | 13.9 | 14.0 | 18.5 | 21.5 | 20.1 | 21.1 | 24.1 | 24.3 | 25.6 | 24.3 | 24.0 |
| 2020 | 18.0 | 5.6 | 13.7 | 14.1 | 18.5 | 21.5 | 20.0 | 20.5 | 23.2 | 23.0 | 25.0 | 23.6 | 24.0 |
| 2021 | 18.5 | 6.1 | 14.1 | 14.5 | 18.9 | 21.9 | 20.6 | 20.6 | 24.2 | 23.6 | 25.5 | 24.3 | 24.7 |

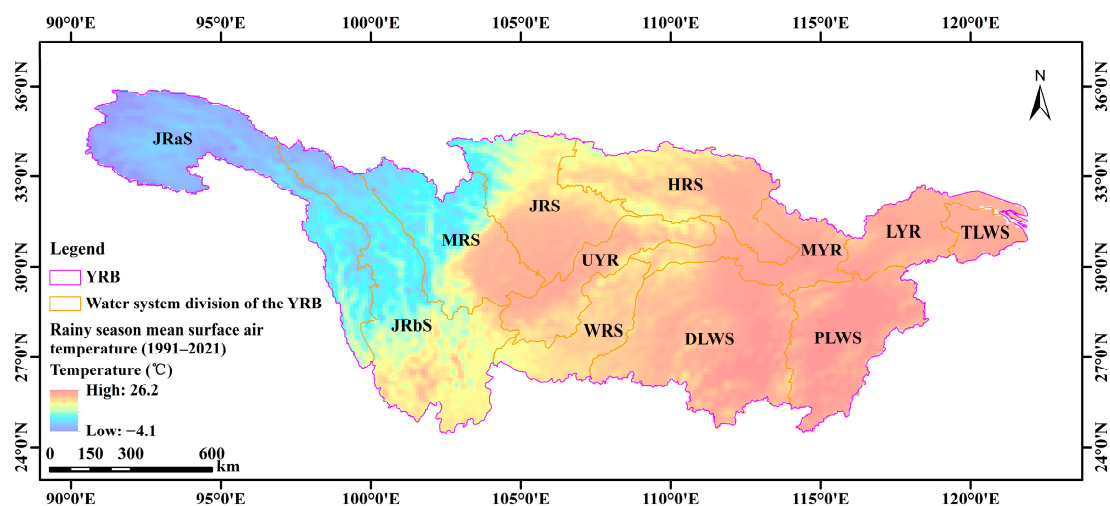

**Figure S6.** Spatial distribution of mean surface air temperature in the YRB during the rainy season from 1991 to 2021.

**Table S5.** Surface air temperature in the YRB and its 12 secondary river systems during the rainy season

from 1991 to 2021.

| Year | YRB  | JRaS | JRbS | MRS  | JRS  | UYR  | WRS  | HRS  | DLWS | MYR  | PLWS | LYR  | TLWS |
|------|------|------|------|------|------|------|------|------|------|------|------|------|------|
| 1991 | 16.8 | 3.1  | 11.6 | 12.5 | 18.1 | 20.8 | 19.1 | 19.9 | 22.7 | 22.5 | 24.4 | 22.9 | 23.2 |
| 1992 | 16.5 | 2.4  | 11.4 | 12.1 | 17.5 | 20.8 | 19.2 | 19.5 | 22.7 | 22.4 | 23.8 | 22.6 | 22.8 |
| 1993 | 16.4 | 2.6  | 11.6 | 12.1 | 17.5 | 20.4 | 18.8 | 19.4 | 22.2 | 22.0 | 23.5 | 22.4 | 22.7 |
| 1994 | 17.2 | 3.6  | 12.0 | 12.9 | 18.3 | 21.3 | 19.3 | 20.5 | 22.6 | 23.1 | 24.0 | 24.2 | 24.5 |
| 1995 | 17.3 | 3.4  | 12.0 | 13.0 | 18.4 | 21.5 | 19.7 | 20.8 | 23.3 | 23.2 | 24.3 | 23.6 | 23.6 |
| 1996 | 17.0 | 3.0  | 11.9 | 12.6 | 18.1 | 21.0 | 19.4 | 20.0 | 22.8 | 22.7 | 24.3 | 23.4 | 23.7 |
| 1997 | 16.6 | 1.9  | 11.3 | 12.2 | 18.3 | 21.1 | 19.1 | 20.7 | 22.4 | 22.9 | 23.4 | 23.4 | 23.6 |
| 1998 | 17.6 | 3.8  | 12.5 | 13.2 | 18.6 | 21.6 | 19.9 | 20.7 | 23.6 | 23.4 | 24.9 | 23.8 | 24.0 |
| 1999 | 16.9 | 3.1  | 11.8 | 12.6 | 18.1 | 21.0 | 19.3 | 20.3 | 22.5 | 22.5 | 24.1 | 22.9 | 23.1 |
| 2000 | 17.0 | 2.9  | 11.6 | 12.8 | 18.3 | 21.1 | 19.5 | 20.2 | 22.9 | 23.1 | 24.3 | 23.8 | 23.9 |
| 2001 | 17.1 | 2.7  | 11.6 | 12.6 | 18.3 | 21.4 | 19.6 | 20.5 | 23.3 | 23.5 | 24.3 | 23.6 | 23.7 |
| 2002 | 16.7 | 2.7  | 11.4 | 12.5 | 18.4 | 21.1 | 19.1 | 20.2 | 22.3 | 22.6 | 23.7 | 23.1 | 23.3 |
| 2003 | 17.3 | 3.2  | 12.1 | 12.6 | 18.1 | 21.2 | 19.7 | 20.0 | 23.4 | 23.1 | 25.2 | 23.7 | 24.1 |
| 2004 | 16.7 | 2.6  | 11.3 | 12.0 | 17.7 | 20.6 | 19.1 | 20.0 | 22.8 | 22.7 | 24.2 | 23.4 | 23.8 |
| 2005 | 17.5 | 3.0  | 12.2 | 12.9 | 18.5 | 21.7 | 20.2 | 20.5 | 23.7 | 23.4 | 25.1 | 24.2 | 24.4 |
| 2006 | 17.9 | 3.3  | 12.3 | 13.7 | 19.7 | 22.8 | 20.6 | 21.6 | 23.8 | 24.1 | 24.8 | 24.2 | 24.5 |
| 2007 | 17.6 | 3.5  | 11.9 | 13.0 | 18.6 | 21.6 | 19.7 | 20.9 | 23.8 | 23.7 | 25.2 | 24.2 | 24.7 |
| 2008 | 17.4 | 2.7  | 11.8 | 13.0 | 18.7 | 21.7 | 19.9 | 20.7 | 23.7 | 23.4 | 24.9 | 23.9 | 24.2 |
| 2009 | 17.7 | 3.3  | 12.5 | 13.1 | 18.6 | 21.8 | 20.1 | 20.8 | 24.0 | 23.8 | 25.3 | 24.1 | 24.4 |
| 2010 | 17.2 | 3.3  | 12.3 | 12.9 | 18.3 | 21.3 | 19.4 | 20.4 | 23.1 | 23.0 | 24.6 | 23.5 | 23.9 |
| 2011 | 17.1 | 2.2  | 11.9 | 12.9 | 18.4 | 21.8 | 19.9 | 20.2 | 23.1 | 22.8 | 24.4 | 23.4 | 23.9 |
| 2012 | 17.2 | 2.7  | 12.1 | 12.6 | 18.4 | 21.2 | 19.4 | 20.9 | 23.2 | 23.3 | 24.4 | 23.7 | 23.8 |
| 2013 | 17.7 | 2.9  | 12.0 | 13.1 | 19.0 | 22.3 | 20.3 | 21.6 | 23.9 | 23.9 | 25.1 | 24.3 | 24.8 |
| 2014 | 17.2 | 3.0  | 12.4 | 12.8 | 18.4 | 21.2 | 19.7 | 20.5 | 23.3 | 22.7 | 24.8 | 23.1 | 23.3 |
| 2015 | 17.2 | 3.1  | 12.2 | 13.0 | 18.5 | 21.4 | 19.7 | 20.5 | 23.0 | 22.9 | 24.0 | 22.9 | 23.1 |
| 2016 | 17.7 | 3.4  | 12.5 | 13.5 | 19.1 | 21.9 | 20.2 | 21.1 | 23.4 | 23.3 | 25.0 | 23.8 | 24.3 |
| 2017 | 17.5 | 3.2  | 12.4 | 13.2 | 18.8 | 21.7 | 20.0 | 20.8 | 23.3 | 23.1 | 25.0 | 23.8 | 24.3 |
| 2018 | 17.5 | 2.9  | 12.0 | 12.8 | 18.7 | 21.7 | 19.9 | 21.1 | 23.6 | 23.8 | 25.1 | 24.2 | 24.4 |
| 2019 | 17.6 | 3.0  | 12.7 | 12.9 | 18.3 | 21.4 | 19.9 | 21.0 | 23.8 | 23.8 | 25.2 | 23.9 | 23.7 |
| 2020 | 17.5 | 4.2  | 12.7 | 13.2 | 18.4 | 21.4 | 19.7 | 20.4 | 23.0 | 22.9 | 24.9 | 23.5 | 23.9 |
| 2021 | 17.9 | 4.3  | 12.9 | 13.3 | 18.6 | 21.7 | 20.3 | 20.5 | 24.0 | 23.5 | 25.4 | 24.2 | 24.5 |



**Figure S7.** Spatial distribution of average evapotranspiration during rainy season over the YRB from

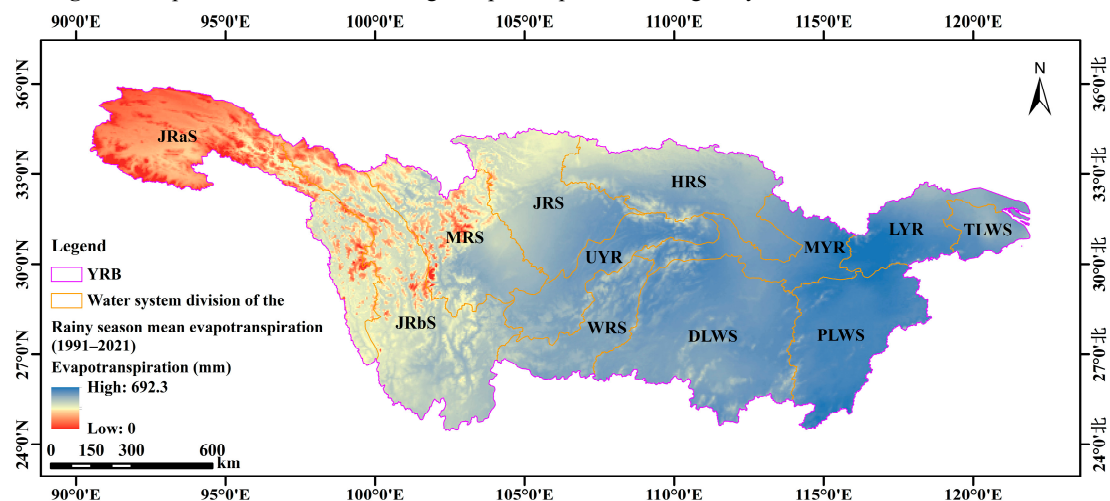

1991 to 2021.

**Table S6.** Evapotranspiration in the YRB and its 12 secondary river systems during the rainy season from 1991 to 2021.

| Year | YRB   | JRaS  | JRbS  | MRS   | JRS   | UYR   | WRS   | HRS   | DLWS  | MYR   | PLWS  | LYR   | TLWS  |
|------|-------|-------|-------|-------|-------|-------|-------|-------|-------|-------|-------|-------|-------|
| 1991 | 512.4 | 302.9 | 416.3 | 440.8 | 510.9 | 577.2 | 559.6 | 562.8 | 601.2 | 586.1 | 640.3 | 651.6 | 647.0 |
| 1992 | 490.1 | 283.0 | 437.8 | 450.6 | 519.1 | 569.2 | 541.4 | 532.7 | 529.4 | 548.3 | 596.0 | 594.6 | 571.1 |
| 1993 | 506.8 | 273.5 | 433.3 | 449.4 | 527.9 | 563.8 | 547.5 | 547.2 | 589.3 | 604.3 | 619.7 | 635.2 | 625.8 |
| 1994 | 520.1 | 287.8 | 464.4 | 463.7 | 489.5 | 596.3 | 579.6 | 536.4 | 624.1 | 659.2 | 673.6 | 562.6 | 507.1 |
| 1995 | 513.0 | 302.7 | 445.9 | 457.7 | 501.4 | 604.1 | 592.2 | 514.4 | 610.3 | 634.0 | 628.6 | 563.7 | 566.7 |
| 1996 | 511.2 | 289.1 | 450.3 | 439.6 | 503.5 | 571.7 | 562.8 | 575.2 | 600.3 | 624.5 | 636.6 | 586.6 | 497.8 |
| 1997 | 504.7 | 288.9 | 452.5 | 483.7 | 491.0 | 557.0 | 553.4 | 461.8 | 609.2 | 582.5 | 666.6 | 584.0 | 524.8 |
| 1998 | 507.4 | 322.1 | 415.8 | 442.8 | 511.8 | 577.3 | 574.8 | 543.7 | 574.9 | 614.5 | 610.4 | 628.1 | 603.4 |
| 1999 | 500.6 | 306.2 | 441.6 | 425.9 | 496.0 | 557.3 | 545.6 | 483.9 | 598.1 | 601.5 | 625.7 | 607.2 | 585.0 |
| 2000 | 532.6 | 305.8 | 456.0 | 448.1 | 493.6 | 571.1 | 569.4 | 583.6 | 635.6 | 664.8 | 677.4 | 655.0 | 668.0 |
| 2001 | 484.5 | 308.7 | 466.1 | 452.4 | 464.0 | 543.0 | 531.2 | 439.0 | 566.8 | 490.2 | 647.4 | 523.0 | 521.6 |
| 2002 | 540.1 | 312.3 | 489.7 | 477.1 | 528.8 | 590.7 | 557.7 | 587.0 | 607.2 | 651.7 | 676.4 | 664.2 | 652.0 |
| 2003 | 503.8 | 304.9 | 455.3 | 465.0 | 526.3 | 585.3 | 554.6 | 560.5 | 526.1 | 627.4 | 537.8 | 691.4 | 519.7 |
| 2004 | 540.5 | 323.0 | 488.2 | 471.2 | 542.3 | 614.0 | 603.1 | 580.8 | 629.1 | 647.7 | 675.1 | 573.7 | 511.5 |
| 2005 | 536.7 | 330.8 | 467.8 | 485.0 | 536.6 | 620.4 | 591.9 | 574.8 | 559.0 | 672.1 | 671.6 | 690.1 | 575.2 |
| 2006 | 546.3 | 319.8 | 510.5 | 495.5 | 494.3 | 580.1 | 595.7 | 539.4 | 669.1 | 660.0 | 671.3 | 657.2 | 562.0 |
| 2007 | 547.7 | 316.8 | 484.1 | 479.5 | 519.5 | 609.8 | 620.6 | 581.3 | 641.8 | 662.1 | 659.4 | 692.9 | 620.2 |
| 2008 | 562.1 | 334.0 | 498.1 | 491.7 | 553.7 | 641.1 | 623.2 | 568.5 | 662.9 | 673.2 | 702.1 | 666.9 | 580.7 |
| 2009 | 541.2 | 354.8 | 482.9 | 480.5 | 538.8 | 615.1 | 589.5 | 572.1 | 583.0 | 614.1 | 673.8 | 660.4 | 632.1 |
| 2010 | 544.0 | 350.7 | 464.5 | 466.8 | 519.5 | 601.7 | 590.0 | 568.2 | 618.4 | 671.7 | 681.8 | 684.8 | 627.6 |
| 2011 | 521.9 | 323.0 | 458.5 | 508.0 | 574.9 | 580.0 | 521.8 | 540.6 | 573.0 | 578.5 | 658.8 | 606.2 | 538.8 |
| 2012 | 538.1 | 327.3 | 431.3 | 457.9 | 527.9 | 576.8 | 554.3 | 556.5 | 638.3 | 678.5 | 721.0 | 678.7 | 619.6 |
| 2013 | 552.6 | 302.5 | 507.1 | 517.0 | 595.4 | 675.0 | 604.1 | 611.1 | 603.0 | 696.8 | 579.2 | 671.1 | 595.8 |
| 2014 | 513.6 | 312.2 | 416.9 | 430.5 | 502.7 | 576.7 | 552.4 | 518.8 | 609.0 | 642.4 | 648.0 | 674.1 | 647.2 |
| 2015 | 535.6 | 295.0 | 453.6 | 465.1 | 512.6 | 602.4 | 574.3 | 572.7 | 624.9 | 658.7 | 681.2 | 699.6 | 665.2 |
| 2016 | 554.7 | 360.7 | 483.1 | 508.6 | 543.6 | 626.2 | 622.4 | 549.5 | 643.3 | 621.6 | 690.5 | 643.3 | 629.1 |

|      |       |       |       |       |       |       |       |       |       |       |       |       |       |
|------|-------|-------|-------|-------|-------|-------|-------|-------|-------|-------|-------|-------|-------|
| 2017 | 542.2 | 357.9 | 480.3 | 482.8 | 535.5 | 619.2 | 593.6 | 577.1 | 596.1 | 650.6 | 643.8 | 644.9 | 619.0 |
| 2018 | 546.2 | 334.7 | 470.6 | 472.9 | 522.4 | 602.3 | 600.4 | 534.6 | 648.7 | 618.0 | 716.3 | 692.6 | 648.4 |
| 2019 | 475.4 | 353.6 | 469.3 | 472.3 | 503.9 | 543.9 | 552.1 | 461.8 | 510.2 | 445.5 | 513.3 | 464.0 | 579.8 |
| 2020 | 519.6 | 365.2 | 469.1 | 463.6 | 518.4 | 534.0 | 538.0 | 524.3 | 596.9 | 588.1 | 646.4 | 588.3 | 584.3 |
| 2021 | 536.3 | 353.2 | 482.9 | 492.8 | 539.4 | 603.0 | 595.3 | 574.0 | 581.8 | 613.8 | 610.0 | 644.8 | 674.3 |
